# Supplementary material for: Optimized growth and anisotropic properties of Li2ZrTeO6 nonlinear optical crystals
Source: Royal Society of Chemistry journal article supplement (doi:10.1039/d1ce00619c), 2021-01-01
Supplement: d1ce00619c1.pdf [file d1ce00619c1.pdf]

## Supporting Information

### Optimized Growth and the Anisotropic Properties of the Nonlinear Optical Crystal $\text{Li}_2\text{ZrTeO}_6$

Xiaojie Guo, Zeliang Gao\*, Fuan Liu, Xiaoli Du, Xiangmei Wang, Feifei Guo, Chengcheng Li,  
Youxuan Sun and Xutang Tao\*

State Key Laboratory of Crystal Materials, Institute of Crystal Materials, Shandong University,  
Jinan 250100, P. R. China.

### CONTENTS

**Figure S1.** The crystal indexes of the peaks in the powder XRD patterns.

**Figure S2.** The different thermal fields for  $\text{Li}_2\text{ZrTeO}_6$  crystal growth.

**Figure S3.** The different solution viscosities for  $\text{Li}_2\text{ZrTeO}_6$  crystal growth.

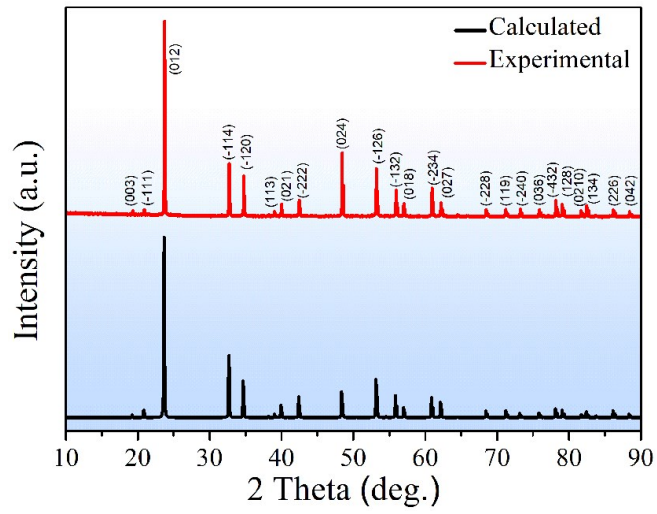

**Figure S1.** The crystal indexes of the peaks in the powder XRD patterns.

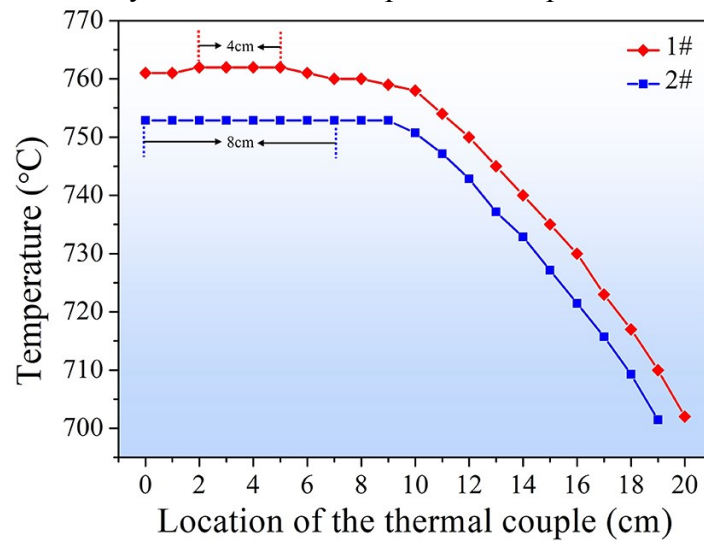

**Figure S2.** The different thermal fields for  $\text{Li}_2\text{ZrTeO}_6$  crystal growth.

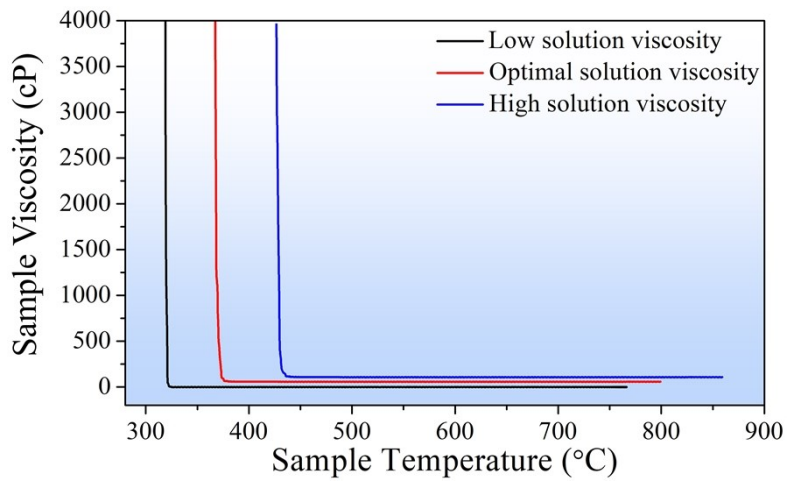

**Figure S3.** The different solution viscosities for  $\text{Li}_2\text{ZrTeO}_6$  crystal growth.
